# Supplementary material
Source: PubMed Central journal article supplement (PMC5316366)
Supplement: NIHMS837534-supplement.pdf [file NIHMS837534-supplement.pdf]

**Online Supplement to**

**Cardiac proteasome functional insufficiency plays a pathogenic role in diabetic  
cardiomyopathy**

Li, PA28 $\alpha$  overexpression improves diabetic cardiomyopathy

Jie Li, MD, PhD<sup>a, b</sup>, Wenxia Ma, MS<sup>a</sup>, Guihua Yue, MD, PhD<sup>a, c</sup>, Yaoliang Tang, MD, PhD<sup>a</sup>, Ilman Kim, PhD<sup>a</sup>, Neal L. Weintraub, MD<sup>a</sup>, Xuejun Wang, MD, PhD<sup>b</sup>, Huabo Su, PhD<sup>a, b, d\*</sup>

From <sup>a</sup> the Vascular Biology Center, Medical College of Georgia, Augusta University, Augusta, Georgia, United States; <sup>b</sup> the Division of Basic Biomedical Sciences, Sanford School of Medicine, University of South Dakota, Vermillion, South Dakota, United States; <sup>c</sup> the Department of Cardiology, Guangxi University of Chinese Medicine, Nanning, Guangxi, China; <sup>d</sup> the Department of Pharmacology and Toxicology, Medical College of Georgia, Augusta University, Augusta, Georgia, United States.

\* Address correspondence to: Dr. Huabo Su, Ph.D., Vascular Biology Center, Medical College of Georgia, Augusta University, 1459 Laney Walker Blvd, Augusta, GA 30912. Tel.: 706-721-9152; FAX: 706-721-9799, e-mail: [HSU@augusta.edu](mailto:HSU@augusta.edu).

## Supplemental Figure 1

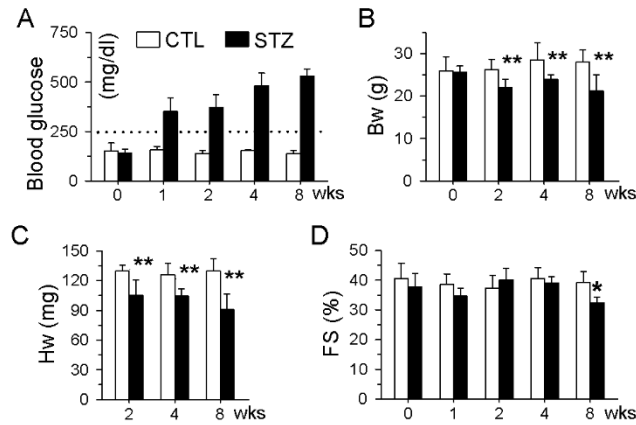

**Supplemental figure 1, related to Figure 1.** Generation of STZ-induced diabetic mouse models. GFPdgn male mice received 5 daily STZ (50 mg/kgBw, Diabetic) or vehicle (CTL) injections. **A**, Blood glucose level reached the criteria for the diagnosis of diabetes (250 mg/dl) 1 week after STZ-treatment and was sustained thereafter. **B-C**, STZ-treatment led to loss of body weight (Bw) (**B**) and heart weight (Hw) (**C**). **D**, Echocardiography detected diminished fraction shortening (FS) at 8 weeks after STZ-treatment, indicating impaired cardiac function. n=6~8 per group. \* $P < 0.05$ , \*\* $P < 0.01$  versus CTL.

## Supplemental Figure 2

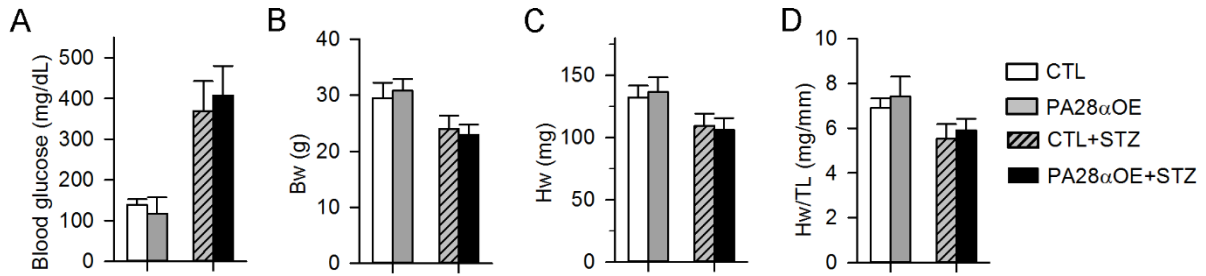

**Supplemental figure 2, related to Figure 5-6.** PA28 $\alpha$ OE did not alter cardiac mass in diabetic mice. Diabetes was induced in tTA (CTL) and tTA/PA28 $\alpha$  (PA28 $\alpha$ OE) mice with 5 consecutive daily injections of STZ for 8 weeks. **A**, Blood glucose levels after overnight fasting. **B-D**, Changes of body weight (Bw) (**B**), heart weight (Hw) (**C**) and Hw to tibial length (TL) ratio (**D**) at 8 weeks after STZ injections.
